# Supplementary material
Source: HighWire-hosted journal article supplement (https://bmjopen.bmj.com/content/11/8/e053302)
Supplement: inline-supplementary-material-1 [file inline-supplementary-material-1.pdf]

## Supplementary Materials – Search Planning Document

### Keywords

| Concept                       | Synonym                                                                                                                                                                                                                                                                                                                                                                                                                                                                                                                                                                                                                                                                                                                                                                                                                                                                                                                                |
|-------------------------------|----------------------------------------------------------------------------------------------------------------------------------------------------------------------------------------------------------------------------------------------------------------------------------------------------------------------------------------------------------------------------------------------------------------------------------------------------------------------------------------------------------------------------------------------------------------------------------------------------------------------------------------------------------------------------------------------------------------------------------------------------------------------------------------------------------------------------------------------------------------------------------------------------------------------------------------|
| ERCP                          | ERCP [Keyword]; “endoscopic retrograde cholangiopancreatography” [Keyword]; cholangiopancreatography, endoscopic retrograde [MeSH]                                                                                                                                                                                                                                                                                                                                                                                                                                                                                                                                                                                                                                                                                                                                                                                                     |
| Adverse Events                | “adverse event*” [Keyword]; “adverse effect*” [Keyword]; “adverse reaction*” [Keyword]; long term adverse effects [MeSH]; “post-ERCP pancreatitis” [Keyword]; “post-endoscopic retrograde cholangiopancreatography pancreatitis” [Keyword]; pancreatitis [Keyword, MeSH]; hemorrhage [Keyword, MeSH]; haemorrhage [Keyword]; cholangitis [Keyword, MeSH]; bleeding [Keyword]; infection* [Keyword]; infections [MeSH]; cholecystitis [Keyword, MeSH]; perforation [Keyword]; cardiopulmonary [Keyword]; sepsis [Keyword, MeSH]; complication* [Keyword]; unplanned [Keyword]; event* [Keyword]; sedation [Keyword]; cholecystectomy [Keyword, MeSH]; choledocholithiasis [Keyword, MeSH]; “risk factor*” [Keyword]; risk factors [MeSH]; “postoperative complication*” [Keyword]; postoperative complications [MeSH]; “treatment outcome*” [Keyword]; treatment outcome [MeSH]; inflammation [Keyword, MeSH]; rupture [Keyword, MeSH]; |
| RCTs*                         | RCT [Keyword]; “randomized controlled trial*” [Keyword]; randomized controlled trial [MeSH]; randomized controlled trials as topic [MeSH]; “clinical trial*” [Keyword]; clinical trial [MeSH]; clinical trials as topic [MeSH]                                                                                                                                                                                                                                                                                                                                                                                                                                                                                                                                                                                                                                                                                                         |
| Cohort/Observational Studies* | “observational study” [Keyword, MeSH]; “cohort study” [Keyword]; cohort studies [MeSH]                                                                                                                                                                                                                                                                                                                                                                                                                                                                                                                                                                                                                                                                                                                                                                                                                                                 |

\*a combination of MeSH headings, publication types, and methodological search filters, <https://guides.library.ualberta.ca/health-sciences-search-filters/study-type-filters> will be used

## ***Suggested Search Strings***

### **Search Aspect #1: RCTs**

(ERCP OR "endoscopic retrograde cholangiopancreatography")→limit to RCTs

(ERCP OR "endoscopic retrograde cholangiopancreatography") AND ("adverse event\*" OR "adverse effect\*" OR "adverse reaction\*" OR "post-ERCP pancreatitis" OR "post-endoscopic retrograde cholangiopancreatography pancreatitis" OR pancreatitis OR hemorrhage OR haemorrhage OR cholangitis OR bleeding OR infection\* OR cholecystitis OR perforation OR cardiopulmonary OR sepsis OR complication\* OR unplanned OR event\* OR sedation OR cholecystectomy OR choledocholithiasis OR "risk factor\*" OR "postoperative complication\*" OR "treatment outcome\*" OR inflammation OR rupture)→limit to RCTs

### **Search Aspect #2: Cohort/Observational Studies**

(ERCP OR "endoscopic retrograde cholangiopancreatography")→limit to cohort/observational studies

(ERCP OR "endoscopic retrograde cholangiopancreatography") AND ("adverse event\*" OR "adverse effect\*" OR "adverse reaction\*" OR "post-ERCP pancreatitis" OR "post-endoscopic retrograde cholangiopancreatography pancreatitis" OR pancreatitis OR hemorrhage OR haemorrhage OR cholangitis OR bleeding OR infection\* OR cholecystitis OR perforation OR cardiopulmonary OR sepsis OR complication\* OR unplanned OR event\* OR sedation OR cholecystectomy OR choledocholithiasis OR "risk factor\*" OR "postoperative complication\*" OR "treatment outcome\*" OR inflammation OR rupture)→limit to cohort/observational studies

## ***MEDLINE (Ovid) Search Strategy***

1. ERCP.ab,ti.
2. "endoscopic retrograde cholangiopancreatography".ab,ti.
3. exp Cholangiopancreatography, Endoscopic Retrograde/
4. 1 or 2 or 3
5. "adverse event\*" ".ab,ti.
6. "adverse effect\*" ".ab,ti.
7. "adverse reaction\*" ".ab,ti.
8. exp Long Term Adverse Effects/
9. "post-ERCP pancreatitis".ab,ti.
10. "post-endoscopic retrograde cholangiopancreatography pancreatitis".ab,ti.
11. pancreatitis.ab,ti.
12. exp Pancreatitis/
13. exp Hemorrhage/
14. hemorrhage.ab,ti.
15. haemorrhage.ab,ti.
16. cholangitis.ab,ti.

17. exp Cholangitis/
18. bleeding.ab,ti.
19. "infection\*".ab,ti.
20. exp Infections/
21. exp Cholecystitis/
22. cholecystitis.ab,ti.
23. perforation.ab,ti.
24. cardiopulmonary.ab,ti.
25. sepsis.ab,ti.
26. exp Sepsis/
27. "complication\*".ab,ti.
28. unplanned.ab,ti.
29. "event\*".ab,ti.
30. sedation.ab,ti.
31. cholecystectomy.ab,ti.
32. exp Cholecystectomy/
33. exp Choledocholithiasis/
34. choledocholithiasis.ab,ti.
35. "risk factor\* ".ab,ti.
36. exp Risk Factors/
37. "postoperative complication\* ".ab,ti.
38. exp Postoperative Complications/
39. exp Treatment Outcome/
40. "treatment outcome\* ".ab,ti.
41. inflammation.ab,ti.
42. rupture.ab,ti.
43. exp Inflammation/
44. exp Rupture/
45. 5 or 6 or 7 or 8 or 9 or 10 or 11 or 12 or 13 or 14 or 15 or 16 or 17 or 18 or 19 or 20 or 21 or 22 or 23 or 24 or 25 or 26 or 27 or 28 or 29 or 30 or 31 or 32 or 33 or 34 or 35 or 36 or 37 or 38 or 39 or 40 or 41 or 42 or 43 or 44
46. randomized controlled trial.pt.
47. clinical trial.pt.
48. randomi?ed.ti,ab.
49. placebo.ti,ab.
50. dt.fs.
51. randomly.ti,ab.
52. trial.ti,ab.
53. groups.ti,ab.
54. or/46-53
55. animals/
56. humans/
57. 55 not (55 and 56)
58. 54 not 57
59. RCT.ab,ti.
60. "randomized controlled trial\* ".ab,ti.

61. "clinical trial\* ".ab,ti.
62. exp Randomized Controlled Trial/
63. exp Randomized Controlled Trials as Topic/
64. exp Clinical Trial/
65. exp Clinical Trials as Topic/
66. 59 or 60 or 61 or 62 or 63 or 64 or 65
67. "observational study".ab,ti.
68. "cohort study".ab,ti.
69. exp Observational Study/
70. exp Cohort Studies/
71. 67 or 68 or 69 or 70
72. 4 and 45
73. limit 72 to (clinical trial, all or clinical trial, phase i or clinical trial, phase ii or clinical trial, phase iii or clinical trial, phase iv or clinical trial protocol or clinical trial protocols as topic or clinical trial or controlled clinical trial or randomized controlled trial)
74. limit 72 to observational study
75. limit 4 to (clinical trial, all or clinical trial, phase i or clinical trial, phase ii or clinical trial, phase iii or clinical trial, phase iv or clinical trial protocol or clinical trial protocols as topic or clinical trial or controlled clinical trial or randomized controlled trial)
76. limit 4 to observational study
77. 58 or 66
78. 4 and 77
79. 4 and 71
80. 75 or 78
81. 76 or 79
82. limit 80 to (english language and yr="2000 -Current")
83. limit 81 to (english language and yr="2000 -Current")
84. 72 and 77
85. 71 and 72
86. 73 or 84
87. 74 or 85
88. limit 86 to (english language and yr="2000 -Current")
89. limit 87 to (english language and yr="2000 -Current")
90. 82 or 83 or 88 or 89
91. remove duplicates from 90

### **Databases**

MEDLINE (Ovid); PubMed; CINAHL; EMBASE; Scopus; Web of Science; Evidence-Based Medicine (EBM) Reviews

### **Limits**

Language: English  
Publication Date: 2000 – present
